# Supplementary material for: Median preoptic area neurons are required for the cooling and febrile activations of brown adipose tissue thermogenesis in rat
Source: Springer Nature journal article supplement (doi:10.1038/s41598-020-74272-w), 2020-10-22
Supplement: MOESM1 [file 41598_2020_74272_MOESM1_ESM.pdf]

## Supplementary Information

### Median preoptic area neurons are required for the cooling and febrile activations of brown adipose tissue thermogenesis in rat.

Ellen Paula Santos da Conceição<sup>1</sup>, Shaun F. Morrison<sup>1</sup>, Georgina Cano<sup>2</sup>, Pierfrancesco Chiavetta<sup>1</sup>, and \*Domenico Tupone<sup>1,3</sup>

<sup>1</sup>Department of Neurological Surgery, Oregon Health & Science University, Portland, OR 97239, USA.

<sup>2</sup>Department of Neuroscience, University of Pittsburgh, Pittsburgh, PA 15260, USA.

<sup>3</sup>Department of Biomedical and Neuromotor Science, University of Bologna, Bologna 40126, Italy.

\*Corresponding author: domenico.tupone@gmail.com

#### S1. Saline injection in MnPO does not influence febrile BAT thermogenesis elicited by PGE<sub>2</sub> in MPA

aCSF injection in MnPO did not affect the PGE<sub>2</sub>-evoked elevation in BAT SNA (Fig. 1A; pre-aCSF: 2270 ± 657.8% BL vs. post-aCSF: 2410 ± 472.9% BL,  $F_{(40,3)} = 0.9088$ ,  $p=0.6267$ ; IC<sub>(-120s vs 900s)</sub>,  $n = 4$ ,  $t^*=0.5728$ ,  $p>0.05$ ), the expired CO<sub>2</sub> (pre-aCSF: 4.0 ± 0.5% vs. post-aCSF: 4.2 ± 0.5%,  $F_{(40,3)} = 2.85$ ,  $p<0.0001$ ; IC (-120s vs 900s),  $n = 4$ ,  $t^*=1.922$ ,  $p>0.05$ ) or HR (pre-aCSF: 493 ± 17.8 bpm vs. post-aCSF: 505 ± 17.9 bpm,  $F_{(40,3)} = 1.430$ ,  $p=0.0718$ ; IC<sub>(-120s vs 900s)</sub>,  $n = 4$ ,  $t^*=1.291$ ,  $p>0.05$ ). We observed a small, but significant, increase in T<sub>BAT</sub> after the aCSF injection (pre-aCSF: 36.8 ±

0.7 °C vs. post-aCSF:  $37.3 \pm 0.8$  °C,  $F_{(40,3)} = 21.98$ ,  $p < 0.0001$ ;  $IC_{(-120s \text{ vs } 900s)}$ ,  $n = 4$ ,  $t^* = 8.396$ ,  $p < 0.05$ ). This increase in  $T_{BAT}$  was not caused by the aCSF injection itself, but rather it was the continuation of the slowly rising increase (i.e., a delayed plateau) in  $T_{BAT}$  that was part of the response to the administration of  $PGE_2$ .

## **S2. Saline injection in MPA or MnPO did not influence cold-evoked increases in BAT SNA and BAT thermogenesis**

Injection of saline vehicle into the MPA did not alter the level of cold-evoked BAT SNA (Fig. 3; pre-saline in MPA level of  $1151 \pm 486.4\%$  BL vs. post-saline in MPA level of  $1417 \pm 485.8\%$  BL,  $F_{(40,4)} = 0.9360$ ,  $p = 0.5669$ ;  $IC_{(-120s \text{ vs } 600s)}$ ,  $n = 5$ ,  $t^* = 0.022$ ,  $p > 0.05$ ). In contrast to rats treated with muscimol in MPA (Fig. 2), nanoinjection of saline vehicle in MPA did not affect the ability of skin warming ( $\Delta T_{SKIN}$ :  $+5.6 \pm 1.2$  °C from a baseline of  $34.0 \pm 0.6$  °C;  $F_{(8,3)} = 17.26$ ,  $p < 0.0001$ ;  $IC_{(-120s \text{ vs } 120s)}$ ,  $n = 4$ ,  $t^* = 6.5$ ,  $p < 0.05$ ) to reduce the skin/core cooling-evoked increases in BAT SNA ( $\Delta$  BAT SNA: pre-skin warming  $+1366 \pm 352.9\%$  BL vs. post-skin warming  $+799.1 \pm 319.4\%$  BL,  $F_{(8,3)} = 3.781$ ,  $p = 0.0053$ ;  $IC_{(-120s \text{ vs } 120s)}$ ,  $n = 4$ ,  $t^* = 4.294$ ,  $p < 0.05$ ). Nanoinjection of saline vehicle in the MnPO did not produce any change in the level of cold-evoked BAT SNA (Fig. 3A; pre-saline:  $1243 \pm 438.0\%$  BL vs post-saline:  $1159 \pm 420.7\%$  BL,  $F_{(40,4)} = 0.4816$ ,  $p = 0.9960$ ;  $IC_{(-120s \text{ vs } 600s)}$ ,  $n =$

5,  $t^*=0.5549$ ,  $p>0.05$ ). These data demonstrate that the effects of nanoinjecting muscimol in either the MPA or the MnPO do not arise from either the volume injected or from the vehicle.

### **S3. Distributions of cold- or warm-activated POA neurons that project to DMH or rRPa**

In agreement with a previous study<sup>12</sup>, we found numerous CTb-immunoreactive (-ir) and FG-ir neurons in both the MnPO and MPA regions (Fig. 7A). Following CTb injections in the right DMH, we found an ipsilateral predominance of CTb-ir neurons in the MPA, as well as in the MnPO at rostral levels (e.g., Fig. 7A, bregma 0.0 mm to -0.24 mm). Following FG injections in the rRPa, FG-ir neurons were distributed bilaterally in the MPA and MnPO (Fig. 7A). Consistent with the previous study<sup>12</sup>, we observed double-labeled neurons (i.e., CTb-ir and FG-ir, indicating MnPO neurons with bifurcating axons projecting to both DMH and rRPa) in the MnPO (at bregma level:  $23.3 \pm 6.5$ , at -0.12 mm caudal to bregma level:  $9.3 \pm 1.8$ , and at -0.24 mm caudal to bregma level:  $15.8 \pm 3.7$ ) and in the MPA (at -0.12 mm caudal to bregma level:  $7.8 \pm 2.7$  and at -0.24 mm caudal to bregma level:  $10.4 \pm 3.4$ ). Relative to the total number of CTb-ir neurons in the MnPO, there was only a small number of double-labeled CTb-ir and FG-ir neurons in the MnPO (at bregma level:  $6.9 \pm 1.8\%$ , at -0.12 mm caudal to bregma level:  $6.6 \pm 1.5\%$ , and at -0.24 mm caudal to bregma level:  $8.7 \pm 1.6\%$ ). Both cold and warm exposure induced c-Fos expression in neurons in the MnPO and MPA. In the MnPO, the number of c-Fos-ir neurons was significantly greater in cold-exposed rats than in warm-exposed rats at the level of bregma ( $570.5 \pm 21.2$  for cold vs.  $255.0 \pm 69.1$  for warm,  $n = 11$ ,  $t=3.917$   $p=0.0029$ ) and at -0.12 mm caudal to bregma level ( $260.0 \pm 64.1$  for cold vs.  $94.6 \pm 11.6$  for warm,  $n = 11$ ,  $t=2.861$   $p=0.0121$ ). In the MPA, the number of c-Fos-ir neurons was also significantly greater in cold-

exposed rats than in warm-exposed rats at -0.12 mm caudal to bregma level ( $179 \pm 19.4$  for cold vs.  $86.4 \pm 21.9$  for warm;  $n = 11$ ,  $t=3.065$ ,  $p=0.0091$ ).

#### **S4. Distribution and quantification of triple-labeled (CTb-ir, FG-ir, and c-Fos-ir) neurons in POA**

In the MnPO, the number of double-labeled (CTb-ir and FG-ir) neurons that were also c-Fos-ir was not different between cold- and warm-exposed rats at the level of bregma ( $3.5 \pm 0.8$  for cold vs.  $1.8 \pm 0.8$  for warm,  $t=0.5580$ ,  $p=0.2658$ ), at -0.12 mm caudal to bregma level ( $2.5 \pm 1.3$  for cold vs.  $0.4 \pm 0.4$  for warm,  $n = 11$ ,  $t=1.584$   $p=0.068$ ), and at -0.24 mm caudal to bregma level ( $1.9 \pm 1.4$  for cold vs.  $0.8 \pm 0.6$  for warm,  $n = 11$ ,  $t=0.7965$   $p=0.2259$ ). In the MPA, the number of double-labeled CTb-FG-ir neurons that were also c-Fos-ir was not significantly different between cold- and warm-exposed rats at -0.12 mm caudal to bregma level ( $3.0 \pm 1.5$  for cold vs.  $1.6 \pm 0.9$  for warm,  $n = 11$ ,  $t=0.8401$   $p=0.2143$ ), and at -0.24 mm caudal to bregma level ( $3.7 \pm 2.3$  for cold vs.  $0.6 \pm 0.6$  for warm,  $n = 11$ ,  $t=1.507$   $p=0.087$ ).
